# Supplementary material for: TRAF3IP2, a novel therapeutic target in glioblastoma multiforme
Source: PubMed Central journal article supplement (PMC6049871; doi:10.18632/oncotarget.25710), 2018-07-03
Supplement: oncotarget-09-29772-s001.pdf [file oncotarget-09-29772-s001.pdf]

## **TRAF3IP2, a novel therapeutic target in glioblastoma multiforme**

### **SUPPLEMENTARY MATERIALS**

**Supplementary Table 1: Fold change regulation of genes involve in cell cycle regulation ( $\pm 2$  fold change;  $P < 0.05$ ).**  
See Supplementary\_Table\_1

**Supplementary Table 2: Fold change regulation of genes involve in apoptosis pathway ( $\pm 2$  fold change;  $P < 0.05$ ).**  
See Supplementary\_Table\_2

**Supplementary Table 3: Fold change regulation of genes involve in extracellular matrix expression ( $\pm 2$  fold change;  $P < 0.05$ )**

| <b>Gene Symbol</b> | <b>Fold change</b> | <b>P value</b> |
|--------------------|--------------------|----------------|
| RPTN               | 9.0                | 1.2E-05        |
| TIMP3              | 7.4                | 6.1E-08        |
| COL1A2             | 6.3                | 1.1E-05        |
| THBS1              | 5.2                | 1.1E-08        |
| APOH               | 5.0                | 3.4E-06        |
| HTRA1              | 5.0                | 5.2E-08        |
| NDP                | 4.9                | 1.3E-06        |
| MFAP4              | 4.7                | 2.9E-07        |
| EFEMP1             | 4.6                | 3.9E-05        |
| ADAMTSL1           | 4.5                | 1.5E-06        |
| COL5A2             | 3.7                | 7.3E-05        |
| MGP                | 3.6                | 1.4E-05        |
| TNFRSF11B          | 3.4                | 2.4E-06        |
| COL5A1             | 3.3                | 4.4E-06        |
| FBN1               | 3.3                | 3.9E-06        |
| MATN2              | 3.1                | 2.8E-07        |
| RECK               | 3.0                | 3.5E-06        |
| FN1                | 2.8                | 1.3E-06        |
| GPC6               | 2.8                | 1.5E-05        |
| WNT5B              | 2.7                | 4.6E-06        |
| SPARC              | 2.7                | 3.9E-06        |
| HMCN1              | 2.7                | 2.6E-05        |
| NID2               | 2.6                | 2.4E-04        |
| ADAMTS12           | 2.6                | 1.0E-06        |
| IGFBP7             | 2.5                | 8.7E-07        |
| COL6A1             | 2.4                | 1.0E-06        |
| LAMA4              | 2.3                | 1.3E-03        |
| SOD3               | 2.3                | 2.9E-04        |
| LTBP2              | 2.3                | 6.7E-06        |
| AGRN               | 2.3                | 1.8E-05        |
| SPOCK1             | 2.3                | 7.5E-06        |
| ECM2               | 2.2                | 4.5E-05        |
| LAMC1              | 2.2                | 2.5E-05        |
| COL8A1             | 2.2                | 4.5E-05        |
| LEPRE1             | 2.2                | 1.3E-04        |
| TGFB3              | 2.0                | 3.3E-05        |
| TIMP2              | 2.0                | 2.1E-05        |
| LOXL1              | 2.0                | 1.2E-03        |
| ATP7A              | 2.0                | 1.6E-04        |
| COL6A3             | 2.0                | 1.1E-03        |
| MMP12              | -2.2               | 3.2E-05        |
| SERPINA1           | -2.4               | 5.0E-05        |
| ADAMTS5            | -2.4               | 6.0E-05        |
| MMP1               | -3.7               | 7.3E-07        |
| SHH                | -4.2               | 1.5E-05        |

**Supplementary Table 4: Fold change regulation of genes involve in metabolism pathway ( $\pm 2$  fold change;  $P < 0.05$ ).**

See Supplementary\_Table\_4
